# Supplementary material for: Plasma Markers of Disrupted Gut Permeability in Severe COVID-19 Patients
Source: bioRxiv or medRxiv preprint supplement (doi:10.1101/2020.11.13.20231209), 2021-05-15

Supplementary Figure 1

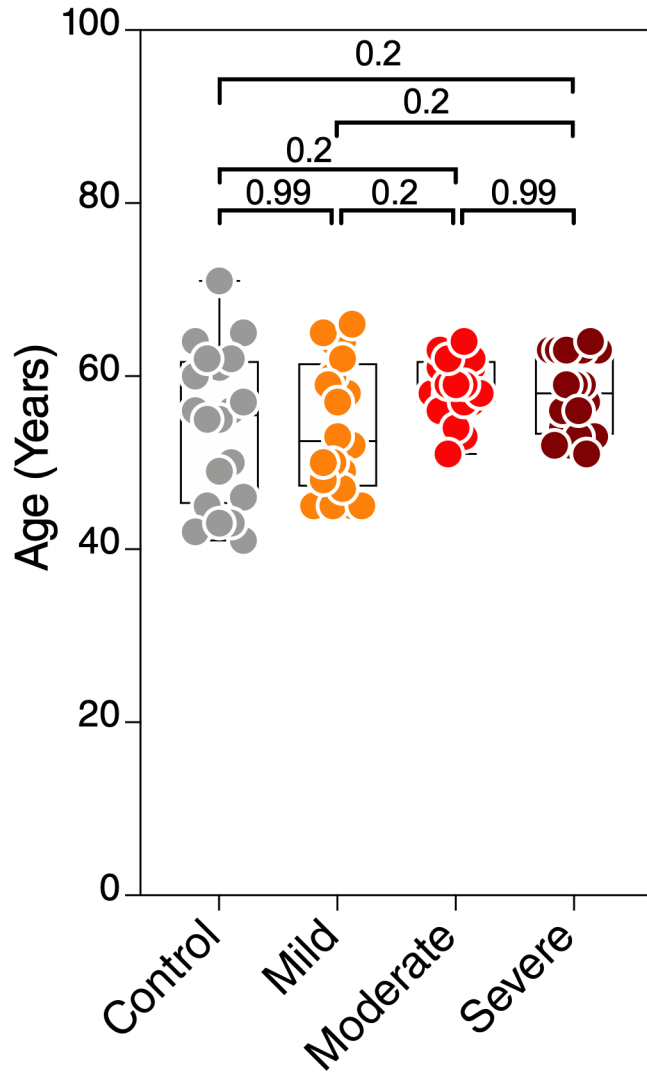

Supplement: Supplementary file [file media-1.pdf]
