# Supplementary material for: Plasma Markers of Disrupted Gut Permeability in Severe COVID-19 Patients
Source: bioRxiv or medRxiv preprint supplement (doi:10.1101/2020.11.13.20231209), 2021-05-15

## Supplementary Figure 2

### Top 25 metabolites induced by severe COVID-19

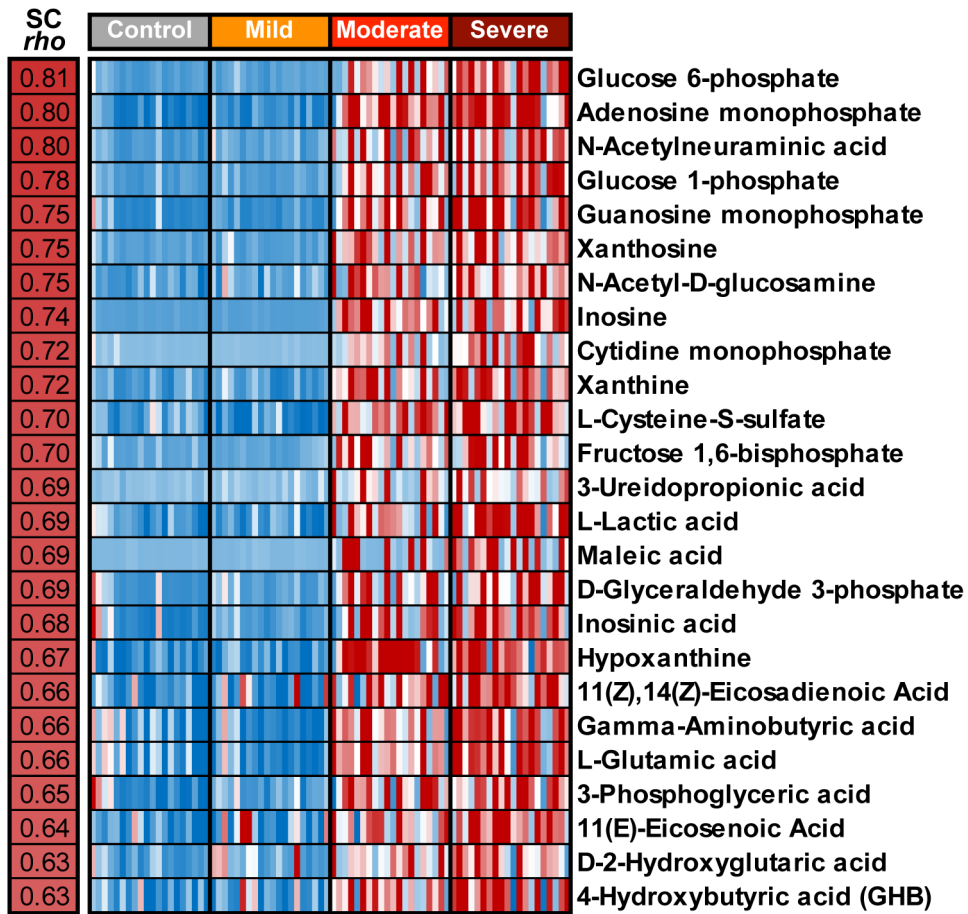

### Top 25 metabolites reduced by severe COVID-19

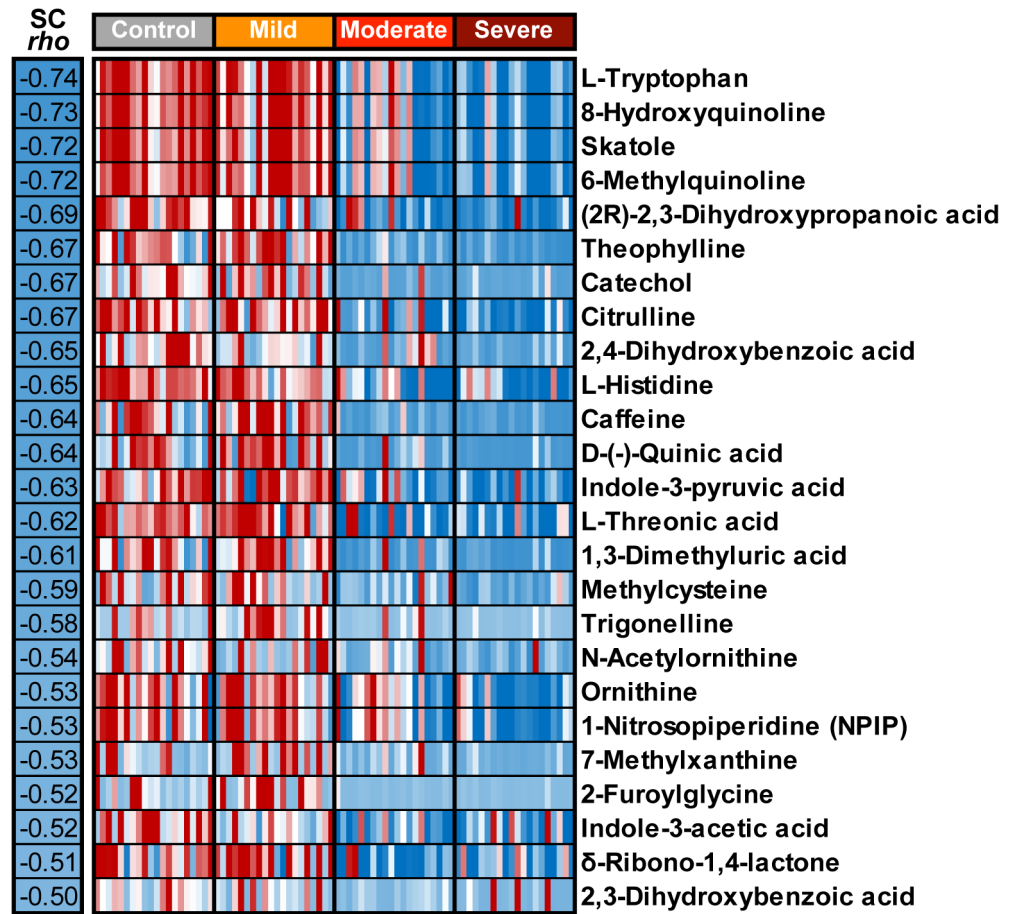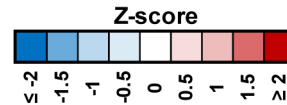

Supplement: Supplementary file [file media-2.pdf]
