# Supplementary material for: Plasma Markers of Disrupted Gut Permeability in Severe COVID-19 Patients
Source: bioRxiv or medRxiv preprint supplement (doi:10.1101/2020.11.13.20231209), 2021-05-15
Supplement: Supplementary file [file media-5.pdf]

**Supplementary Table 1.** Demographic and clinical characteristics of the main study cohort.

|                                | SARS-CoV-2 Negative | SARS-CoV-2 Positive<br>Mild (outpatients) | SARS-CoV-2 Positive<br>Moderate (Inpatients) | SARS-CoV-2 Positive<br>Severe (ICU) |
|--------------------------------|---------------------|-------------------------------------------|----------------------------------------------|-------------------------------------|
| Number ( <i>n</i> )            | 20                  | 20                                        | 20                                           | 20                                  |
| Female, <i>n</i> (%)           | 10 (50)             | 12 (60)                                   | 11 (55)                                      | 7 (35)                              |
| Age, years, median (IQR)       | 55.5 (15.6)         | 52.5 (12.75)                              | 58.5 (4.25)                                  | 58 (9.25)                           |
| Deceased, <i>n</i> (%)         | 0 (0)               | 0 (0)                                     | 2 (10)                                       | 6 (30)                              |
| Body mass index (BMI)          |                     |                                           |                                              |                                     |
| Normal Weight (<25), %         | -                   | 6.7*                                      | 25                                           | 5                                   |
| Overweight/obese (>25), %      | -                   | 93.3*                                     | 75                                           | 95                                  |
| Pre-diabetes, %                | -                   | 6.7*                                      | 15                                           | 30                                  |
| Diabetes Mellitus (DM), %      | -                   | 6.7*                                      | 30                                           | 55                                  |
| High blood pressure, %         | -                   | 33.3*                                     | 60                                           | 60                                  |
| Asthma, %                      | -                   | 13.3*                                     | 15                                           | 5                                   |
| Hydroxychloroquine, %          | -                   | 6.7*                                      | 40                                           | 55                                  |
| Remdesivir, %                  | -                   | -                                         | 5                                            | 25                                  |
| Tocilizumab, %                 | -                   | -                                         | 5                                            | 30                                  |
| Chronic Steroid Use, %         | -                   | -                                         | 25                                           | 5                                   |
| Acute Steroid Use, %           | -                   | -                                         | 15                                           | 45                                  |
| Plasma IV nutrition, %         | -                   | -                                         | 0                                            | 0                                   |
| Enteral nutrition use, %       | -                   | -                                         | 100                                          | 100                                 |
| Antibiotic administration, %   | -                   | -                                         | 60                                           | 85                                  |
| Ethnicity                      | -                   | -                                         |                                              |                                     |
| African American, <i>n</i> (%) | 0                   | 0                                         | 9 (45)                                       | 7 (35)                              |
| Hispanic or Latino             | 0                   | 2 (10.0)                                  | 6 (30)                                       | 9 (45)                              |
| Caucasian, <i>n</i> (%)        | 3 (15.0)            | 13 (65.0)                                 | 4 (20)                                       | 3 (15)                              |
| Other, <i>n</i> (%)            | 2 (10.0)            | 1 (5.0)                                   | 0                                            | 1 (5)                               |
| Unknown, <i>n</i> (%)          | 15 (75.0)           | 4 (20.0)                                  | 1 (5)                                        | 0                                   |

\*Based on 15 out of 20 donors with available data
