# Supplementary material for: Plasma Markers of Disrupted Gut Permeability in Severe COVID-19 Patients
Source: bioRxiv or medRxiv preprint supplement (doi:10.1101/2020.11.13.20231209), 2021-05-15
Supplement: Supplementary file [file media-6.pdf]

**Supplementary Table 2.** Demographic characteristics of the validation cohort.

|                                | <b>SARS-CoV-2 Negative</b> | <b>SARS-CoV-2 Positive<br/>Mild (outpatients)</b> | <b>SARS-CoV-2 Positive<br/>Moderate (Inpatients)</b> | <b>SARS-CoV-2 Positive<br/>Severe (ICU)</b> |
|--------------------------------|----------------------------|---------------------------------------------------|------------------------------------------------------|---------------------------------------------|
| Number ( <i>n</i> )            | -<br>18                    | -<br>20                                           | -<br>18                                              | -<br>19                                     |
| Female, <i>n</i> (%)           | 12 (67)                    | 9 (45)                                            | 6 (33)                                               | 5 (26)                                      |
| Age, years, median (IQR)       | 38.5 (19.25)               | 60 (10.5)                                         | 64.5 (14.5)                                          | 63 (15.5)                                   |
| Ethnicity                      | -                          | -                                                 | -                                                    | -                                           |
| African American, <i>n</i> (%) | 0 (0)                      | 3 (15)                                            | 6 (33.3)                                             | 2 (10.5)                                    |
| Hispanic or Latino             | 1 (5.6)                    | 6 (30)                                            | 9 (50)                                               | 11 (57.9)                                   |
| Caucasian, <i>n</i> (%)        | 15 (83.3)                  | 5 (25)                                            | 3 (16.7)                                             | 5 (26.3)                                    |
| Other, <i>n</i> (%)            | 2 (11.1)                   | 3 (15)                                            | 0                                                    | 1 (5.3)                                     |
| Unknown, <i>n</i> (%)          | 0 (0)                      | 3 (15)                                            | 0                                                    | 0                                           |
