# Supplementary material for: Plasma Markers of Disrupted Gut Permeability in Severe COVID-19 Patients
Source: bioRxiv or medRxiv preprint supplement (doi:10.1101/2020.11.13.20231209), 2021-05-15
Supplement: Supplementary file [file media-7.pdf]

**Supplementary Table 3.** The structures and names of *N*-glycans identified in plasma by capillary electrophoresis

| Glycan name and structure                                                           | Group                  | Glycan name and structure                                                           | Group                       |
|-------------------------------------------------------------------------------------|------------------------|-------------------------------------------------------------------------------------|-----------------------------|
|    | S2 + ST + FB + LB      |    | G2 + GT + B + FC + LB       |
|    | G2 + GT + LB           |    | S2 + ST + B + FC + LB       |
|    | S1 + ST + LB           |    | G0 + FC + LB                |
|    | S1 + ST + G1 + GT + LB |    | G1 + GT + FC + LB           |
|    | S2 + ST + LB           |    | G1 + GT + FC + LB           |
|    | S3 + ST + FB + HB      |    | G2 + GT + FC + LB           |
|   | S2 + ST + G1 + GT + HB |   | S1 + ST + G1 + GT + FC + LB |
|  | S3 + ST + HB           |  | S1 + ST + G1 + GT + FC + LB |
|  | S3 + ST + G1 + GT + HB |  | S1 + ST + G1 + GT + FC + LB |
|  | S4 + ST + HB           |  | S2 + ST + FC + LB           |
|  | G0 + B + FC + LB       |  | S3 + ST + G1 + GT + FC + HB |
|  | G1 + GT + B + FC + LB  |  | LB                          |

-  Fucose
-  *N*-acetylglucosamine
-  Mannose
-  Galactose
-  *N*-acetylneuraminic acid

These 24 glycan structures can be grouped into 15 groups: bisecting GlcNAc (B group), sialic acid (non-sialylated (S0), mono-sialylated (S1), di-sialylated (S2), tri-sialylated and (S3), tetra-sialylated (S4), and total sialylated (ST)), galactose (agalactosylated (G0), mono-galactosylated (G1), di-galactosylated (G2), and total galactosylated (GT)), core fucose (FC group), branched fucose (FB group), high branched (HB group), and low branch (LB group).
