# Supplementary material for: Plasma Markers of Disrupted Gut Permeability in Severe COVID-19 Patients
Source: bioRxiv or medRxiv preprint supplement (doi:10.1101/2020.11.13.20231209), 2021-05-15
Supplement: Supplementary file [file media-8.pdf]

**Supplementary Table 4.** The structures and names of *N*-glycans identified in isolated IgG by capillary electrophoresis

| Glycan name and structure                                                                       | Group           | Glycan name and structure                                                                          | Group           |
|-------------------------------------------------------------------------------------------------|-----------------|----------------------------------------------------------------------------------------------------|-----------------|
| <b>A2</b> 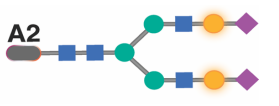     | S2 + ST         | <b>G0FB</b>       | G0 + F + B      |
| <b>A2F</b>     | S2 + ST + F     | <b>G1F [6]</b>    | G1 + GT + F     |
| <b>A2FB</b>    | S2 + ST + F + B | <b>G1F [3]</b>    | G1 + GT + F     |
| <b>A2B</b>     | S2 + ST + B     | <b>G1FB</b>       | G1 + GT + F + B |
| <b>G1FS1</b>   | S1 + ST + F     | <b>G0</b>         | G0              |
| <b>A1</b>      | S1 + ST         | <b>G1S1</b>       | S1 + ST         |
| <b>A1F</b>   | S1 + ST + F     | <b>G2</b>       | G2 + GT         |
| <b>A1FB</b>  | S1 + ST + F     | <b>G2F</b>      | G2 + GT + F     |
| <b>G0F</b>   | G0 + F          | <b>G2FB</b>     | G2 + GT + F + B |
| <b>G1</b>    | G1 + GT         | <b>G1B [3]</b>  | G1 + GT + B     |
| <b>G0B</b>   | G0 + B          | <b>G1B [6]</b>  | G1 + GT + B     |

-  Fucose
-  *N*-acetylglucosamine
-  Mannose
-  Galactose
-  *N*-acetylneuraminic acid

These 22 glycan structures were grouped into 9 groups, depending on the presence or absence of four key monosaccharides: bisecting GlcNAc (B group), sialic acid (mon-sialylated (S1), di-sialylated (S2), and total sialylated (ST)), terminal galactose (agalactosylated (G0), mono-galactosylated (G1), di-galactosylated (G2), and total galactose (GT)), and fucose (F group).
