# Supplementary material for: Plasma Markers of Disrupted Gut Permeability in Severe COVID-19 Patients
Source: bioRxiv or medRxiv preprint supplement (doi:10.1101/2020.11.13.20231209), 2021-05-15
Supplement: Supplementary file [file media-9.pdf]

**SupplementaryTable 5.** Lectins used for 45 lectin microarray <sup>1</sup>

| Name       | Species                            | Origin      | Glycan specificity <sup>2</sup>                                                     |
|------------|------------------------------------|-------------|-------------------------------------------------------------------------------------|
| 1 LTL      | <i>Lotus tetragonolobus</i>        | Natural     | Fuc (Le <sup>x</sup> , Le <sup>y</sup> )                                            |
| 2 PSA      | <i>Pisum sativum</i>               | Natural     | α1-6Fuc up to biantenna                                                             |
| 3 LCA      | <i>Lens culinaris</i>              | Natural     | α1-6Fuc up to biantenna                                                             |
| 4 UEAI     | <i>Ulex europaeus</i>              | Natural     | α1-2Fuc                                                                             |
| 5 AOL      | <i>Aspergillus oryzae</i>          | Recombinant | α1-6Fuc (Core), α1-2Fuc (H), α1-3Fuc (Le <sup>x</sup> ), α1-3Fuc (Le <sup>a</sup> ) |
| 6 AAL      | <i>Aleuria aurantia</i>            | Natural     | α1-6Fuc (Core), α1-2Fuc (H), α1-3Fuc (Le <sup>x</sup> ), α1-3Fuc (Le <sup>a</sup> ) |
| 7 MAL      | <i>Maackia amurensis</i>           | Natural     | α2-3Sia                                                                             |
| 8 SNA      | <i>Sambucus nigra</i>              | Natural     | α2-6Sia                                                                             |
| 9 SSA      | <i>Sambucus sieboldiana</i>        | Natural     | α2-6Sia                                                                             |
| 10 TJAI    | <i>Trichosanthes japonica</i>      | Natural     | α2-6Sia                                                                             |
| 11 PHAL    | <i>Phaseolus vulgaris</i>          | Natural     | GlcNAcβ1-6Man (Tetraantenna)                                                        |
| 12 ECA     | <i>Erythrina cristagalli</i>       | Natural     | βGal                                                                                |
| 13 RCA120  | <i>Ricinus communis</i>            | Natural     | βGal                                                                                |
| 14 PHAE    | <i>Phaseolus vulgaris</i>          | Natural     | bisecting GlcNAc                                                                    |
| 15 DSA     | <i>Datura stramonium</i>           | Natural     | GlcNAcβ1-6Man (Tetraantenna)                                                        |
| 16 GSLII   | <i>Griffonia simplicifolia</i>     | Natural     | GlcNAcβ1-4Man                                                                       |
| 17 NPA     | <i>Narcissus pseudonarcissus</i>   | Natural     | Manα1-3Man                                                                          |
| 18 ConA    | <i>Canavalia ensiformis</i>        | Natural     | M3, Manα1-2Manα1-3(Manα1-6)Man, GlcNAcβ1-2Manα1-3(Manα1-6)Man                       |
| 19 GNA     | <i>Galanthus nivalis</i>           | Natural     | Manα1-3Man, Manα1-6Man                                                              |
| 20 HHL     | <i>Hippeastrum hybrid</i>          | Natural     | Manα1-3Man, Manα1-6Man                                                              |
| 21 ACG     | <i>Agroclybe cylindracea</i>       | Natural     | α2-3Sia                                                                             |
| 22 TxLcl   | <i>Tulipa gesneriana</i>           | Natural     | Mannose/GalNAc                                                                      |
| 23 BPL     | <i>Bauhinia purpurea alba</i>      | Natural     | Galβ1-3GlcNAc(GalNAc), α/βGalNAc                                                    |
| 24 TJAI    | <i>Trichosanthes japonica</i>      | Natural     | α1-2Fuc                                                                             |
| 25 EEL     | <i>Euonymus europaeus</i>          | Natural     | αGal (B)                                                                            |
| 26 ABA     | <i>Agaricus bisporus</i>           | Natural     | Galβ1-3GalNAc (T), GlcNAc                                                           |
| 27 LEL     | <i>Lycopersicon esculentum</i>     | Natural     | Polylactosamine, (GlcNAc)n                                                          |
| 28 STL     | <i>Solanum tuberosum</i>           | Natural     | Polylactosamine, (GlcNAc)n                                                          |
| 29 UDA     | <i>Urtica dioica</i>               | Natural     | (GlcNAc)n                                                                           |
| 30 PWM     | <i>Phytolacca americana</i>        | Natural     | (GlcNAc)n                                                                           |
| 31 Jacalin | <i>Artocarpus integrifolia</i>     | Natural     | Galβ1-3GalNAc (T), GalNAcα (Tn)                                                     |
| 32 PNA     | <i>Arachis hypogaea</i>            | Natural     | Galβ1-3GalNAc (T)                                                                   |
| 33 WFA     | <i>Wisteria floribunda</i>         | Natural     | Terminal GalNAc, LacDiNAc                                                           |
| 34 ACA     | <i>Amaranthus caudatus</i>         | Natural     | Galβ1-3GalNAc (T)                                                                   |
| 35 MPA     | <i>Maclura pomifera</i>            | Natural     | Galβ1-3GalNAc (T), GalNAcα (Tn)                                                     |
| 36 HPA     | <i>Helix pomatia</i>               | Natural     | αGalNAc (A, Tn)                                                                     |
| 37 VVA     | <i>Vicia villosa</i>               | Natural     | α,βGalNAc (A, Tn, LacDiNAc)                                                         |
| 38 DBA     | <i>Dolichos biflorus</i>           | Natural     | α,βGalNAc (A, Tn, LacDiNAc)                                                         |
| 39 SBA     | <i>Glycine max</i>                 | Natural     | α,βGalNAc (A, Tn, LacDiNAc)                                                         |
| 40 Calsepa | <i>Calystegia sepium</i>           | Natural     | Biantenna with bisecting GlcNAc                                                     |
| 41 PTL I   | <i>Psophocarpus tetragonolobus</i> | Natural     | αGalNAc (A, Tn)                                                                     |
| 42 MAH     | <i>Maackia amurensis</i>           | Natural     | α2-3Sia                                                                             |
| 43 WGA     | <i>Triticum vulgare</i>            | Natural     | (GlcNAc)n, polySia                                                                  |
| 44 GSLIA4  | <i>Griffonia simplicifolia</i>     | Natural     | αGalNAc (A, Tn)                                                                     |
| 45 GSLIB4  | <i>Griffonia simplicifolia</i>     | Natural     | αGal (B)                                                                            |

<sup>1</sup>Abbreviations: Gal (D-galactose), GalNAc (N-acetyl-galactosamine), GlcNAc (N-acetyl-glucosamine), Fuc (L-fucose), Glc (D-glucose), Sia (Sialic acid), LacNAc (N-acetyl-lactosamine).

<sup>2</sup>Specificity data was obtained by frontal affinity chromatography and glycoconjugate microarray.
