# Supplementary material for: Plasma Markers of Disrupted Gut Permeability in Severe COVID-19 Patients
Source: bioRxiv or medRxiv preprint supplement (doi:10.1101/2020.11.13.20231209), 2021-05-15
Supplement: Supplementary file [file media-10.pdf]

**Supplementary Table 6.** A list of plasma markers measured in this study.

| Category                                        | Marker                                                                              | Name                                                                      | Method of Measurement                |
|-------------------------------------------------|-------------------------------------------------------------------------------------|---------------------------------------------------------------------------|--------------------------------------|
| <b>Microbial translocation markers</b>          | Zonulin                                                                             | haptoglobin 2 precursor                                                   | ELISA                                |
|                                                 | LBP                                                                                 | Lipopolysaccharide binding protein                                        | ELISA                                |
|                                                 | $\beta$ -D-glucan                                                                   | $\beta$ -D-glucan                                                         | Limulus Amebocyte Lysate (LAL) assay |
|                                                 | sCD14                                                                               | Soulble CD14                                                              | ELISA                                |
|                                                 | sCD163                                                                              | Soulble CD163                                                             | ELISA                                |
|                                                 | OCLN                                                                                | Occludin                                                                  | ELISA                                |
|                                                 | I-FABP                                                                              | Intestinal fatty-acid binding protein                                     | ELISA                                |
|                                                 | Reg3A                                                                               | Regenerating Family Member 3 Alpha                                        | ELISA                                |
| <b>Inflammation and immune function markers</b> | IL-6                                                                                | Interleukin 6                                                             | Multiplex meso scale cytokine assay  |
|                                                 | TNF- $\alpha$                                                                       | tumor necrosis factor alpha                                               | Multiplex meso scale cytokine assay  |
|                                                 | GM-CSF                                                                              | Granulocyte-macrophage colony-stimulating factor                          | Multiplex meso scale cytokine assay  |
|                                                 | IFN- $\alpha$ 2a                                                                    | interferon $\alpha$ 2a                                                    | Multiplex meso scale cytokine assay  |
|                                                 | IFN- $\beta$                                                                        | Interferon beta                                                           | Multiplex meso scale cytokine assay  |
|                                                 | IFN- $\gamma$                                                                       | Interferon gamma                                                          | Multiplex meso scale cytokine assay  |
|                                                 | IL-1 $\beta$                                                                        | Interleukin 1 $\beta$                                                     | Multiplex meso scale cytokine assay  |
|                                                 | IL-2                                                                                | Interleukin 2                                                             | Multiplex meso scale cytokine assay  |
|                                                 | IL-4                                                                                | Interleukin 4                                                             | Multiplex meso scale cytokine assay  |
|                                                 | IL-10                                                                               | Interleukin 10                                                            | Multiplex meso scale cytokine assay  |
|                                                 | IL-12p70                                                                            | Interleukin 12 p70                                                        | Multiplex meso scale cytokine assay  |
|                                                 | IL-12/IL-23p40                                                                      | Interleukin 12 p70                                                        | Multiplex meso scale cytokine assay  |
|                                                 | IL-13                                                                               | Interleukin 13                                                            | Multiplex meso scale cytokine assay  |
|                                                 | IL-15                                                                               | Interleukin-12/interleukin 23 p40                                         | Multiplex meso scale cytokine assay  |
|                                                 | IL-21                                                                               | Interleukin 21                                                            | Multiplex meso scale cytokine assay  |
|                                                 | IL-22                                                                               | Interleukin 22                                                            | Multiplex meso scale cytokine assay  |
|                                                 | IL-23                                                                               | Interleukin 23                                                            | Multiplex meso scale cytokine assay  |
|                                                 | IL-33                                                                               | Interleukin 33                                                            | Multiplex meso scale cytokine assay  |
|                                                 | Fractalkine                                                                         | chemokine (C-X3-C motif) ligand 1 (CX3CL1)                                | Multiplex meso scale cytokine assay  |
|                                                 | IP-10                                                                               | C-X-C motif chemokine ligand 10 (CXCL10)                                  | Multiplex meso scale cytokine assay  |
|                                                 | MCP-2                                                                               | Chemokine (C-C motif) ligand 8 (CCL8)                                     | Multiplex meso scale cytokine assay  |
|                                                 | MIP-1 $\alpha$                                                                      | Macrophage inflammatory protein alpha                                     | Multiplex meso scale cytokine assay  |
|                                                 | SDF-1a                                                                              | stromal cell-derived factor 1 (SDF1) or C-X-C motif chemokine 12 (CXCL12) | Multiplex meso scale cytokine assay  |
|                                                 | CRP                                                                                 | C-reactive protein                                                        | ELISA                                |
|                                                 | d-dimer                                                                             | D-dimer                                                                   | ELISA                                |
|                                                 | MPO                                                                                 | Neutrophil myeloperoxidase                                                | ELISA                                |
|                                                 | GDF-15                                                                              | Growth/differentiation factor 15                                          | ELISA                                |
|                                                 | C3a                                                                                 | Complement component 3a                                                   | ELISA                                |
|                                                 | Gal-1                                                                               | Galectin-1                                                                | ELISA                                |
| Gal-3                                           | Galectin-3                                                                          | ELISA                                                                     |                                      |
| Gal-9                                           | Galectin-9                                                                          | ELISA                                                                     |                                      |
| <b>IgG N-glycome</b>                            | 22 individual glycans structures categorized into 11 groups (Supplementary Table 3) |                                                                           | Capillary electrophoresis            |
| <b>IgA total glycome</b>                        | Binding to 45 lectins with known glycan-binding specificity (Supplementary Table 5) |                                                                           | Lectin microarray                    |
| <b>Plasma N-glycome</b>                         | 23 individual glycans structures categorized into 20 groups (Supplementary Table 4) |                                                                           | Capillary electrophoresis            |
| <b>Plasma total glycome</b>                     | Binding to 45 lectins with known glycan-binding specificity (Supplementary Table 5) |                                                                           | Lectin microarray                    |
| <b>Plasma Metabolome</b>                        | 278 plasma metabolites and three derivative ratios                                  |                                                                           | Mass spectrometry                    |
| <b>Plasma Lipidome</b>                          | 2015 plasma lipids categorized into 24 lipid classes                                |                                                                           | Mass spectrometry                    |
