# Supplementary material for: Plasma Markers of Disrupted Gut Permeability in Severe COVID-19 Patients
Source: bioRxiv or medRxiv preprint supplement (doi:10.1101/2020.11.13.20231209), 2021-05-15
Supplement: Supplementary file [file media-11.pdf]

**Supplementary Table 7.** Top 50 metabolic pathways disrupted by severe COVID-19

| Pathway                                                      | P value    | FDR        | State     | Z      | Ratio  |
|--------------------------------------------------------------|------------|------------|-----------|--------|--------|
| tRNA Charging                                                | 7.9433E-27 | 2.5119E-24 | Activated | 2.828  | 0.22   |
| Superpathway of Citrulline Metabolism                        | 3.9811E-16 | 7.9433E-14 |           | 1.89   | 0.256  |
| Citrulline Biosynthesis                                      | 7.9433E-16 | 1E-13      |           | 1.134  | 0.333  |
| Arginine Biosynthesis IV                                     | 3.9811E-14 | 3.1623E-12 |           | 0      | 0.333  |
| Purine Nucleotides De Novo Biosynthesis II                   | 6.3096E-14 | 3.9811E-12 | Activated | 2.121  | 0.22   |
| Superpathway of Methionine Degradation                       | 1.2589E-11 | 6.9183E-10 |           | 0      | 0.127  |
| NAD biosynthesis II (from tryptophan)                        | 3.1623E-11 | 1.6982E-09 |           | 0.816  | 0.226  |
| Asparagine Biosynthesis I                                    | 5.0119E-11 | 2.3442E-09 |           | 0.447  | 0.625  |
| Proline Biosynthesis II (from Arginine)                      | 6.3096E-11 | 2.3988E-09 |           | 0      | 0.333  |
| Phenylalanine Degradation IV (Mammalian, via Side Chain)     | 6.3096E-11 | 2.3988E-09 |           | 0.378  | 0.206  |
| Purine Nucleotides Degradation II (Aerobic)                  | 7.9433E-11 | 2.7542E-09 |           |        | 0.2    |
| Urea Cycle                                                   | 1.3804E-10 | 3.9811E-09 |           |        | 0.3    |
| Glycolysis I                                                 | 3.3884E-10 | 9.1201E-09 |           |        | 0.167  |
| L-glutamine Biosynthesis II (tRNA-dependent)                 | 4.4668E-10 | 1.0965E-08 |           | 1      | 0.455  |
| Sirtuin Signaling Pathway                                    | 6.6069E-10 | 1.4454E-08 |           | 0.378  | 0.0401 |
| Lysine Degradation V                                         | 6.166E-10  | 1.4454E-08 |           | 0.447  | 0.24   |
| Gluconeogenesis I                                            | 7.7625E-10 | 1.5849E-08 |           |        | 0.149  |
| Alanine Degradation III                                      | 3.7154E-09 | 6.4565E-08 |           | 0      | 0.667  |
| Alanine Biosynthesis II                                      | 3.7154E-09 | 6.4565E-08 |           | 0      | 0.667  |
| Arginine Degradation VI (Arginase 2 Pathway)                 | 4.0738E-09 | 6.4565E-08 |           | 0      | 0.312  |
| 4-hydroxybenzoate Biosynthesis                               | 4.0738E-09 | 6.4565E-08 |           | 0.447  | 0.312  |
| NAD Biosynthesis from 2-amino-3-carboxymuconate Semialdehyde | 4.0738E-09 | 6.4565E-08 |           | 1      | 0.312  |
| Folate Polyglutamylation                                     | 7.9433E-09 | 1.1482E-07 |           | -0.447 | 0.278  |
| 5-aminoimidazole Ribonucleotide Biosynthesis I               | 7.9433E-09 | 1.1482E-07 |           | 1.342  | 0.278  |
| Glutamine Biosynthesis I                                     | 8.7096E-09 | 1.2023E-07 |           | -1     | 0.571  |
| Citrulline Degradation                                       | 1.7378E-08 | 2.2909E-07 |           | 0      | 0.5    |
| (S)-reticuline Biosynthesis II                               | 3.0903E-08 | 3.8019E-07 |           | 1      | 0.444  |
| Glycine Degradation (Creatine Biosynthesis)                  | 3.0903E-08 | 3.8019E-07 |           | 1      | 0.444  |
| γ-glutamyl Cycle                                             | 3.8905E-08 | 4.6774E-07 |           |        | 0.208  |
| 4-aminobutyrate Degradation I                                | 5.1286E-08 | 5.8884E-07 |           | 0      | 0.4    |
| Glutathione Biosynthesis                                     | 8.1283E-08 | 8.9125E-07 |           | 0      | 0.364  |
| Folate Transformations I                                     | 8.9125E-08 | 9.5499E-07 |           |        | 0.179  |
| Glutamate Degradation III (via 4-aminobutyrate)              | 1.2023E-07 | 1.2589E-06 |           |        | 0.333  |
| L-carnitine Biosynthesis                                     | 1.7378E-07 | 1.7378E-06 |           | -1     | 0.308  |
| Arginine Degradation I (Arginase Pathway)                    | 1.7378E-07 | 1.7378E-06 |           |        | 0.308  |
| PFKFB4 Signaling Pathway                                     | 1.9055E-07 | 1.8197E-06 | Activated | 2      | 0.0968 |
| Proline Biosynthesis I                                       | 2.4547E-07 | 2.2909E-06 |           | -1     | 0.286  |
| Cysteine Biosynthesis III (mammalia)                         | 3.8019E-07 | 3.4674E-06 |           |        | 0.135  |
| Salvage Pathways of Pyrimidine Ribonucleotides               | 4.3652E-07 | 3.7154E-06 |           | 0      | 0.0609 |
| Selenocysteine Biosynthesis II (Archaea and Eukaryotes)      | 4.3652E-07 | 3.7154E-06 |           | 1      | 0.25   |
| Citrulline-Nitric Oxide Cycle                                | 4.3652E-07 | 3.7154E-06 |           |        | 0.25   |
| Phosphatidylcholine Biosynthesis I                           | 5.7544E-07 | 4.5709E-06 |           | 1      | 0.235  |
| CMP-N-acetylneuraminat Biosynthesis I (Eukaryotes)           | 5.7544E-07 | 4.5709E-06 |           |        | 0.235  |
| Adenine and Adenosine Salvage VI                             | 6.3096E-07 | 4.8978E-06 |           |        | 0.6    |
| 4-hydroxyphenylpyruvate Biosynthesis                         | 6.3096E-07 | 4.8978E-06 |           |        | 0.6    |
| TCA Cycle II (Eukaryotic)                                    | 7.4131E-07 | 5.4954E-06 |           |        | 0.119  |
| Uridine-5'-phosphate Biosynthesis                            | 9.3325E-07 | 6.4565E-06 |           | 1      | 0.211  |
| Superpathway of Serine and Glycine Biosynthesis I            | 9.3325E-07 | 6.4565E-06 |           |        | 0.211  |
| Sucrose Degradation V (Mammalian)                            | 9.3325E-07 | 6.4565E-06 |           |        | 0.211  |
