# Supplementary material for: Plasma Markers of Disrupted Gut Permeability in Severe COVID-19 Patients
Source: bioRxiv or medRxiv preprint supplement (doi:10.1101/2020.11.13.20231209), 2021-05-15
Supplement: Supplementary file [file media-12.pdf]

**Supplementary Table 8.** List of the gut-associated and gut microbiota-associated metabolites detected in our study using untargeted LC-MS/MS (50 of the 278 metabolites identified in plasma).

| <b>Name</b>                      | <b>Reference</b>                                     |
|----------------------------------|------------------------------------------------------|
| $\alpha$ -Hydroxyhippuric acid   | (Gonthier et al., 2003)                              |
| $\beta$ -D-Glucopyranuronic acid | (Pellock and Redinbo, 2017)                          |
| (2R)-2,3-Dihydroxypropanoic acid | (Monagas et al., 2010)                               |
| 16-Hydroxyhexadecanoic acid      | (Zhitao et al., 2020)                                |
| 2-Hydroxycinnamic acid           | (Coman and Vodnar, 2020)                             |
| 2-Hydroxyhippuric acid           | (Gonthier et al., 2003)                              |
| 2-Hydroxyvaleric acid            | (Skrzypecki et al., 2020)                            |
| 2,3-Dihydroxybenzoic acid        | (Gonthier et al., 2003)                              |
| 2,4-Dihydroxybenzoic acid        | (Marhuenda-Munoz et al., 2019)                       |
| 3-Hydroxybutyric acid            | (Selkrig et al., 2014)                               |
| 3-Indoxyl sulphate               | (Farowski et al., 2019)                              |
| 3-methylphenylacetic acid        | (Marhuenda-Munoz et al., 2019)                       |
| 4-Hydroxybenzaldehyde            | (Marhuenda-Munoz et al., 2019)                       |
| 4-Hydroxyproline                 | (Huang et al., 2018)                                 |
| Acetylcholine                    | (Rea et al., 2016)                                   |
| Allantoin                        | (Pan et al., 2020)                                   |
| Cholic acid                      | (Molinero et al., 2019)                              |
| Choline                          | (Arias et al., 2020)                                 |
| Citrulline                       | (Fragkos and Forbes, 2018)                           |
| D-(-)-Mannitol                   | (Maekawa et al., 2005)                               |
| D-Glucose                        | (Utzschneider et al., 2016)                          |
| Decanoic acid                    | (Mathewson et al., 2016)                             |
| Deoxycholic Acid                 | (Ridlon et al., 2014)                                |
| Glucose 6-phosphate              | (Di Rienzi and Britton, 2020)                        |
| Glycine                          | (Craft et al., 1968)                                 |
| Glycocholic acid                 | (Ridlon et al., 2014)                                |
| Glycoursodeoxycholic acid        | (Ridlon et al., 2014)                                |
| Glycyl-L-leucine                 | (Yasumoto and Sugiyama, 1980)                        |
| Hippuric acid                    | (Gonthier et al., 2003;Marhuenda-Munoz et al., 2019) |
| Indole-3-acetic acid             | (Gao et al., 2018)                                   |
| Indole-3-lactic acid             | (Gao et al., 2018)                                   |
| Indole-3-pyruvic acid            | (Gao et al., 2018)                                   |
| Kynurenic acid                   | (Ridlon et al., 2014)                                |
| L-Isoleucine                     | (Krautkramer et al., 2020)                           |
| L-Kynurenine                     | (Gao et al., 2018)                                   |
| L-Lactic acid                    | (Jain et al., 2019;Krautkramer et al., 2020)         |
| L-Leucine                        | (Krautkramer et al., 2020)                           |
| L-Serine                         | (Jain et al., 2019;Krautkramer et al., 2020)         |
| L-Threonine                      | (Jain et al., 2019)                                  |
| L-Tryptophan                     | (Gao et al., 2018;Krautkramer et al., 2020)          |
| L-Valine                         | (Krautkramer et al., 2020)                           |
| N-Acetyl-DL-tryptophan           | (Zhang et al., 2019)                                 |
| Pentadecanoic acid               | (Mathewson et al., 2016)                             |
| Phosphoenolpyruvic acid          | (Krautkramer et al., 2020)                           |
| Pipecolic acid                   | (Jain et al., 2019)                                  |
| Pyruvic acid                     | (Krautkramer et al., 2020)                           |
| Succinic acid                    | (Oliphant and Allen-Vercoe, 2019)                    |
| Taurochenodeoxycholic Acid       | (Ridlon et al., 2014)                                |
| Trans-Cinnamic acid              | (Kong, 2015)                                         |
| Trimethylamine N-oxide           | (Heianza et al., 2020)                               |
