# Supplementary material for: Plasma Markers of Disrupted Gut Permeability in Severe COVID-19 Patients
Source: bioRxiv or medRxiv preprint supplement (doi:10.1101/2020.11.13.20231209), 2021-05-15
Supplement: Supplementary file [file media-13.pdf]

**Supplementary Table 9.** Two thousand fifteen lipids identified in this study were assigned to 24 lipid classes.

| <b>Group</b>          | <b>Abbreviation</b> | <b>Class</b>                               | <b>Number of lipids</b> |
|-----------------------|---------------------|--------------------------------------------|-------------------------|
| <b>Phospholipids</b>  | CL                  | Cardiolipin                                | 2                       |
|                       | LPA                 | Lysophosphatidic acid                      | 2                       |
|                       | PA                  | Phosphatidic acid                          | 8                       |
|                       | LPC                 | Lysophosphatidylcholine                    | 110                     |
|                       | PC                  | Phosphatidylcholine                        | 262                     |
|                       | LPE                 | Lysophosphatidylethanolamine               | 22                      |
|                       | PE                  | Phosphatidylethanolamine                   | 139                     |
|                       | PG                  | Phosphatidylglycerol                       | 10                      |
|                       | LPI                 | Lysophosphatidylinositol                   | 6                       |
|                       | PI                  | Phosphatidylinositol                       | 47                      |
|                       | LPS                 | Lysophosphatidylserine                     | 1                       |
|                       | PS                  | Phosphatidylserine                         | 11                      |
| <b>Neutral lipids</b> | ChE                 | Cholesterol ester                          | 22                      |
|                       | DG/DAG              | Diglyceride                                | 58                      |
|                       | TG/TAG              | Triglyceride                               | 742                     |
| <b>Sphingolipids</b>  | Cer                 | Ceramide                                   | 121                     |
|                       | Hex1Cer             | Simple Glc series (Ceramide with 1 hexose) | 21                      |
|                       | Hex2Cer             | Simple Glc series (Ceramide with 2 hexose) | 10                      |
|                       | Hex3Cer             | Simple Glc series (Ceramide with 3 hexose) | 9                       |
|                       | LSM                 | Lysosphingomyelin                          | 1                       |
|                       | SM                  | Sphingomyelin                              | 359                     |
|                       | SPH                 | Sphingosine                                | 1                       |
| <b>Other lipids</b>   | AcCa                | Acyl carnitine                             | 46                      |
|                       | Co                  | Coenzyme                                   | 5                       |
