# Supplementary material for: Plasma Markers of Disrupted Gut Permeability in Severe COVID-19 Patients
Source: bioRxiv or medRxiv preprint supplement (doi:10.1101/2020.11.13.20231209), 2021-05-15
Supplement: Supplementary file [file media-14.pdf]

**Table 1.** Levels of the 35 out of 50 gut- and gut microbiota-associated plasma metabolites that are disrupted during COVID-19

| Group<br>Compared to group        | log <sub>2</sub> ratio |          |         |          |        |          | FDR     |                    |                    |                    |                    |          |
|-----------------------------------|------------------------|----------|---------|----------|--------|----------|---------|--------------------|--------------------|--------------------|--------------------|----------|
|                                   | Mild                   | Moderate | Severe  | Moderate | Severe | Severe   | Mild    | Moderate           | Severe             | Moderate           | Severe             | Severe   |
|                                   | Control                | Control  | Control | Mild     | Mild   | Moderate | Control | Control            | Control            | Mild               | Mild               | Moderate |
| 2,3-Dihydroxy benzoic acid        | -0.09                  | -1.78    | 0.02    | -1.70    | 0.11   | 1.81     | 0.64    | 0.0002             | 0.003              | 0.015              | 0.033              | 0.76     |
| Decanoic acid                     | -0.04                  | -1.68    | -1.32   | -1.64    | -1.28  | 0.36     | 0.90    | 0.004              | 0.009              | 0.0006             | 0.001              | 0.98     |
| (2R)-2,3-Dihydroxy propanoic acid | -0.57                  | -1.39    | -2.30   | -0.81    | -1.73  | -0.91    | 0.39    | 0.0005             | 8x10 <sup>-6</sup> | 0.004              | 3x10 <sup>-5</sup> | 0.78     |
| Indole-3-acetic acid              | -0.50                  | -1.31    | -0.86   | -0.81    | -0.36  | 0.45     | 0.39    | 0.0002             | 0.001              | 0.007              | 0.023              | 0.92     |
| Pipecolic acid                    | -0.34                  | -1.02    | -1.56   | -0.68    | -1.21  | -0.53    | 0.55    | 0.008              | 0.0002             | 0.24               | 0.012              | 0.48     |
| Hippuric acid                     | -0.49                  | -1.02    | 0.59    | -0.54    | 1.07   | 1.61     | 0.98    | 0.021              | 0.10               | 0.028              | 0.14               | 0.94     |
| 2,4-Dihydroxy benzoic acid        | -0.67                  | -0.99    | -2.67   | -0.32    | -1.99  | -1.67    | 0.39    | 0.002              | 4x10 <sup>-6</sup> | 0.039              | 7x10 <sup>-5</sup> | 0.85     |
| Indole-3-pyruvic acid             | -0.09                  | -0.90    | -1.35   | -0.81    | -1.26  | -0.46    | 0.98    | 0.001              | 1x10 <sup>-5</sup> | 0.004              | 9x10 <sup>-5</sup> | 0.68     |
| 3-methylphenylacetic acid         | -0.52                  | -0.75    | -0.77   | -0.23    | -0.25  | -0.02    | 0.64    | 0.031              | 0.013              | 0.56               | 0.84               | 0.92     |
| L-Tryptophan                      | -0.04                  | -0.65    | -0.91   | -0.62    | -0.88  | -0.26    | 0.93    | 0.0001             | 2x10 <sup>-6</sup> | 0.0006             | 4x10 <sup>-6</sup> | 0.68     |
| Citrulline                        | 0.04                   | -0.57    | -1.08   | -0.61    | -1.12  | -0.51    | 0.95    | 0.002              | 5x10 <sup>-6</sup> | 0.003              | 6x10 <sup>-6</sup> | 0.51     |
| Deoxycholic Acid                  | -0.68                  | -0.45    | -1.42   | 0.23     | -0.74  | -0.97    | 0.98    | 0.29               | 0.020              | 0.19               | 0.016              | 0.71     |
| Pyruvic acid                      | 0.03                   | -0.37    | -0.52   | -0.40    | -0.54  | -0.15    | 0.96    | 0.020              | 0.001              | 0.013              | 0.0006             | 0.76     |
| L-Serine                          | -0.36                  | -0.30    | -0.61   | 0.06     | -0.25  | -0.31    | 0.39    | 0.079              | 0.001              | 0.78               | 0.18               | 0.51     |
| 4-Hydroxy benzaldehyde            | 0.00                   | -0.28    | -0.31   | -0.28    | -0.31  | -0.03    | 0.90    | 0.009              | 0.018              | 0.21               | 0.16               | 0.95     |
| L-Threonine                       | -0.05                  | -0.22    | -0.39   | -0.17    | -0.34  | -0.17    | 0.88    | 0.035              | 0.002              | 0.047              | 0.002              | 0.76     |
| 2-Hydroxy cinnamic acid           | -0.02                  | -0.19    | -0.27   | -0.17    | -0.25  | -0.08    | 0.87    | 0.016              | 0.012              | 0.27               | 0.16               | 0.98     |
| Glycine                           | -0.12                  | 0.02     | -0.58   | 0.14     | -0.46  | -0.60    | 0.78    | 0.062              | 0.001              | 0.41               | 0.027              | 0.51     |
| Allantoin                         | -0.09                  | 0.14     | -0.55   | 0.23     | -0.45  | -0.69    | 0.96    | 0.25               | 0.010              | 0.27               | 0.017              | 0.53     |
| 4-Hydroxy proline                 | -0.04                  | 0.29     | 0.11    | 0.33     | 0.15   | -0.18    | 0.90    | 0.020              | 0.67               | 0.018              | 0.93               | 0.48     |
| Glycyl-L-leucine                  | -0.08                  | 0.34     | 0.68    | 0.42     | 0.76   | 0.34     | 0.93    | 0.49               | 0.056              | 0.31               | 0.036              | 0.68     |
| Choline                           | -0.23                  | 0.35     | 0.63    | 0.58     | 0.86   | 0.28     | 0.39    | 0.32               | 0.010              | 0.025              | 0.0003             | 0.68     |
| 2-Hydroxy hippuric acid           | -0.98                  | 0.64     | 2.42    | 1.61     | 3.40   | 1.79     | 0.49    | 0.075              | 0.028              | 0.73               | 0.24               | 0.76     |
| trans-Cinnamic acid               | -0.13                  | 0.66     | 0.39    | 0.80     | 0.53   | -0.27    | 0.59    | 0.022              | 0.012              | 0.004              | 0.003              | 0.95     |
| Succinic acid                     | -0.02                  | 0.68     | 1.49    | 0.70     | 1.51   | 0.81     | 0.64    | 0.023              | 7x10 <sup>-5</sup> | 0.037              | 2x10 <sup>-5</sup> | 0.48     |
| Phosphoenolpyruvic acid           | -0.11                  | 0.70     | 1.01    | 0.82     | 1.12   | 0.30     | 0.74    | 0.013              | 0.0003             | 0.010              | 7x10 <sup>-5</sup> | 0.68     |
| Acetylcholine                     | -0.02                  | 0.72     | 0.55    | 0.74     | 0.57   | -0.17    | 0.69    | 0.028              | 0.053              | 0.012              | 0.036              | 0.92     |
| L-Lactic acid                     | -0.06                  | 0.91     | 1.29    | 0.96     | 1.35   | 0.39     | 0.90    | 0.0002             | 2x10 <sup>-5</sup> | 0.0001             | 7x10 <sup>-5</sup> | 0.48     |
| L-Kynurenine                      | 0.28                   | 0.96     | 1.20    | 0.69     | 0.93   | 0.24     | 0.39    | 0.002              | 5x10 <sup>-5</sup> | 0.024              | 0.002              | 0.68     |
| 16-Hydroxy hexadecanoic acid      | 0.94                   | 1.46     | 1.19    | 0.52     | 0.25   | -0.27    | 0.39    | 0.0002             | 0.0008             | 0.16               | 0.24               | 0.90     |
| 2-Hydroxy valeric acid            | 1.12                   | 1.57     | 1.63    | 0.45     | 0.51   | 0.07     | 0.79    | 0.003              | 0.0004             | 0.025              | 0.016              | 0.94     |
| Glucose 6-phosphate               | 0.04                   | 1.93     | 2.55    | 1.89     | 2.51   | 0.62     | 0.64    | 2x10 <sup>-5</sup> | 3x10 <sup>-6</sup> | 1x10 <sup>-5</sup> | 4x10 <sup>-6</sup> | 0.48     |
| Kynurenic acid                    | 0.00                   | 2.29     | 2.53    | 2.29     | 2.54   | 0.24     | 0.79    | 0.60               | 0.008              | 0.69               | 0.034              | 0.68     |
| β-D-Glucopyranuronic acid         | 0.01                   | 2.64     | 2.77    | 2.63     | 2.76   | 0.13     | 0.69    | 0.088              | 0.0002             | 0.27               | 9x10 <sup>-5</sup> | 0.68     |
| 3-Hydroxy butyric acid            | 0.91                   | 2.88     | 3.66    | 1.97     | 2.75   | 0.78     | 0.90    | 0.002              | 5x10 <sup>-6</sup> | 0.010              | 7x10 <sup>-5</sup> | 0.70     |
