# Supplementary material for: Plasma Markers of Disrupted Gut Permeability in Severe COVID-19 Patients
Source: bioRxiv or medRxiv preprint supplement (doi:10.1101/2020.11.13.20231209), 2021-05-15
Supplement: Supplementary file [file media-15.pdf]

**Table 2.** Logistic regression models of tight junction permeability and microbial translocation markers for their ability to distinguish hospitalized from non-hospitalized individuals.

| Variables                                                  | AUC   | SE  | 95% Confidence interval |       | P-value (single predictor models vs. Lasso selected multivariable model) |
|------------------------------------------------------------|-------|-----|-------------------------|-------|--------------------------------------------------------------------------|
| Variables identified by Lasso multivariable logistic model | 0.992 | 0   | 0.981                   | 1.000 | reference                                                                |
| <b>Zonulin</b>                                             | 0.951 | 0   | 0.901                   | 1.000 | 0.0656                                                                   |
| <b>LBP</b>                                                 | 0.944 | 0   | 0.885                   | 1.000 | 0.0987                                                                   |
| $\beta$ glucan                                             | 0.841 | 0   | 0.748                   | 0.933 | 0.0008                                                                   |
| <b>sCD14</b>                                               | 0.930 | 0   | 0.871                   | 0.988 | 0.0323                                                                   |
| Occludin                                                   | 0.663 | 0.1 | 0.542                   | 0.783 | <0.0001                                                                  |
| Reg3A                                                      | 0.635 | 0.1 | 0.510                   | 0.759 | <0.0001                                                                  |
| sCD163                                                     | 0.627 | 0.1 | 0.503                   | 0.751 | <0.0001                                                                  |
| IFABP                                                      | 0.538 | 0.1 | 0.408                   | 0.668 | <0.0001                                                                  |

Bold variables are variables selected by Lasso to be included in the multivariable logistic model; AUC = Area under the ROC Curve; SE = Standard error
