# Supplementary material for: Plasma Markers of Disrupted Gut Permeability in Severe COVID-19 Patients
Source: bioRxiv or medRxiv preprint supplement (doi:10.1101/2020.11.13.20231209), 2021-05-15
Supplement: Supplementary file [file media-16.pdf]

**Table 3.** AUC values of the logistic regression model built with data from the main cohort and validated with data from the validation cohort.

| <b>Cohort</b>          | <b>n</b> | <b>AUC</b> | <b>SE</b> | <b>95% Confidence interval</b> |
|------------------------|----------|------------|-----------|--------------------------------|
| <b>Main (training)</b> | 79       | 0.9923     | 0.0057    | 0.981 - 1                      |
| <b>Validation</b>      | 75       | 0.886      | 0.042     | 0.803 - 0.968                  |
